# Supplementary material
Source: MDPI journal article supplement (https://www.mdpi.com/2072-4292/15/7/1896)
Supplement: s1 [file s1]

Archive with 4 entries (4 files):
- Figure S1. Processing Report.pdf
- Figure S2. High-resolution orthophoto image.tif
- Figure S3. Land cover classification.pdf
- Table S1. Error matrix.pdf
